# Supplementary material for: Facile synthesis of a 2D multilayer core–shell MnO2@LDH@MMT composite with a nanoflower shape for electromagnetic wave absorption
Source: Royal Society of Chemistry journal article supplement (doi:10.1039/d2ce00928e), 2022-01-01
Supplement: d2ce00928e1.pdf [file d2ce00928e1.pdf]

## Supporting Information (SI)

### Facile synthesis of 2D multilayer core-shell MnO<sub>2</sub>@LDH@MMT composites with nanoflower shape for electromagnetic wave absorption

Quan Zhou<sup>a,1</sup>, Xingjian Dai<sup>a,1</sup>, Kailin Li<sup>a</sup>, Shuang Yi<sup>a</sup>, Jinsong Rao<sup>a\*</sup>, Yuxin Zhang<sup>a\*</sup>

*<sup>a</sup>College of Materials Science and Engineering, Chongqing University, Chongqing, 400044, China*

#### Corresponding author:

\*To whom all correspondence should be addressed.

E-mail: Jinsong Rao: [rjs@cqu.edu.cn](mailto:rjs@cqu.edu.cn)

Yuxin Zhang: [zhangyuxin@cqu.edu.cn](mailto:zhangyuxin@cqu.edu.cn)

<sup>1</sup>These authors contributed equally: Quan Zhou, Xingjian Dai

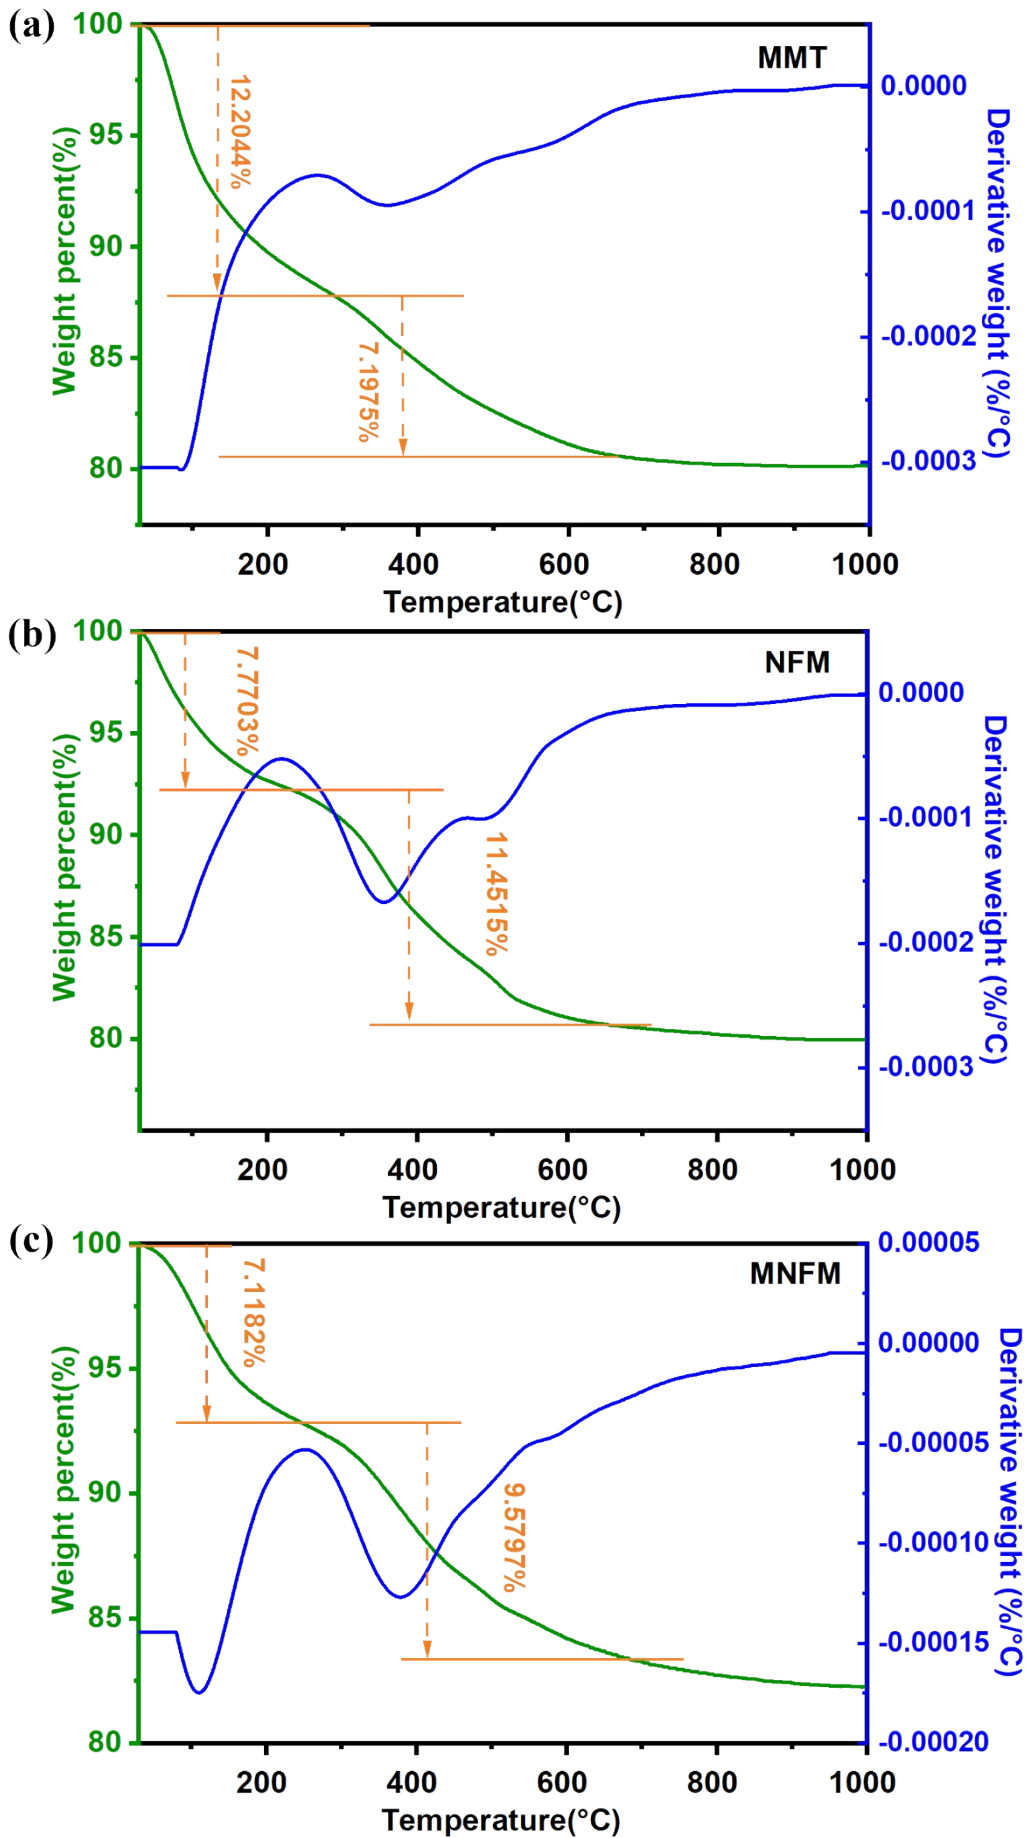

Fig. S1. TGA-DTG curves of (a) MMT, (b) NFM, (c)MNFM.

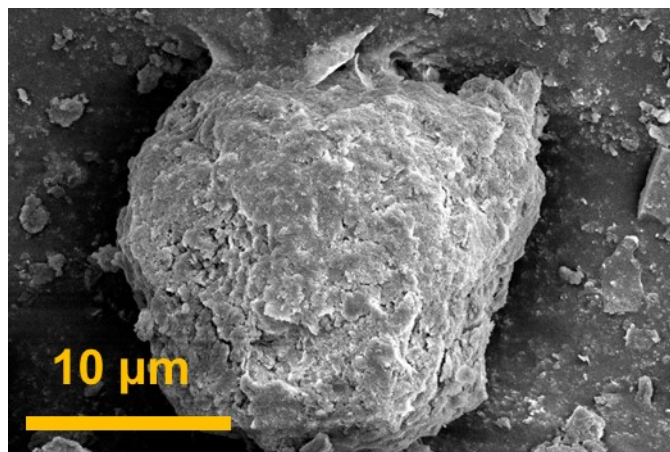

**Fig. S2.** SEM images of the MMT

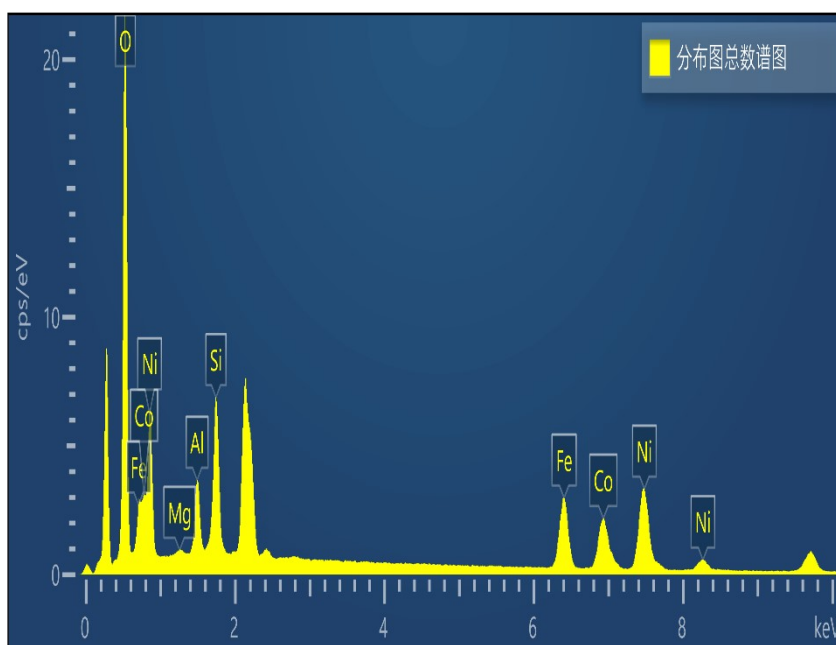

**Fig. S3.** Elemental distribution of NFM.

Sum Spectrum

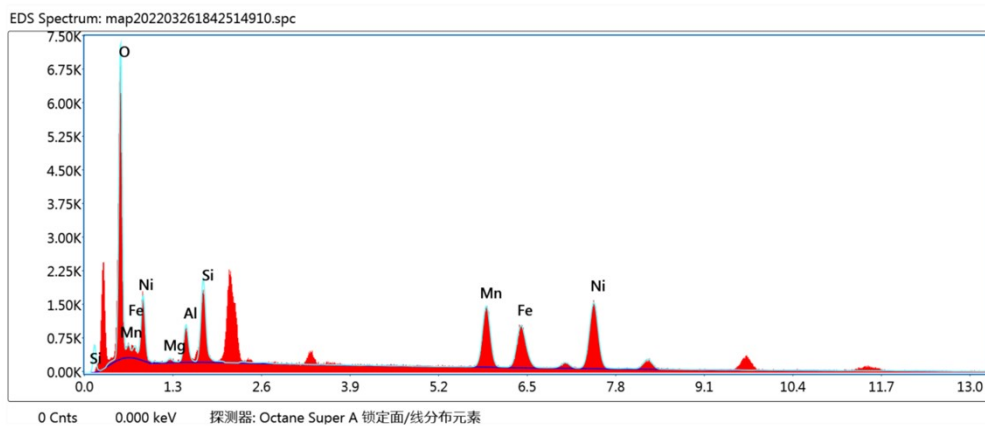

智能定量结果

| 元素  | 重量百分比 | 原子百分比 | 净强度    | 错误%   | Kratio | Z      | A      | F      |
|-----|-------|-------|--------|-------|--------|--------|--------|--------|
| O K | 28.68 | 54.75 | 483.24 | 6.80  | 0.1544 | 1.1543 | 0.4665 | 1.0000 |
| MgK | 0.57  | 0.72  | 7.46   | 27.80 | 0.0017 | 1.0727 | 0.2804 | 1.0010 |
| AlK | 4.16  | 4.71  | 75.40  | 9.27  | 0.0173 | 1.0342 | 0.4027 | 1.0017 |
| SiK | 7.54  | 8.20  | 175.19 | 7.18  | 0.0409 | 1.0580 | 0.5120 | 1.0023 |
| MnK | 16.42 | 9.13  | 214.92 | 3.14  | 0.1553 | 0.8852 | 0.9986 | 1.0696 |
| FeK | 12.14 | 6.64  | 142.63 | 3.82  | 0.1166 | 0.8998 | 0.9997 | 1.0672 |
| NiK | 30.49 | 15.86 | 259.23 | 2.98  | 0.2726 | 0.9099 | 0.9734 | 1.0095 |

Fig. S4. Elemental distribution of MNFM.

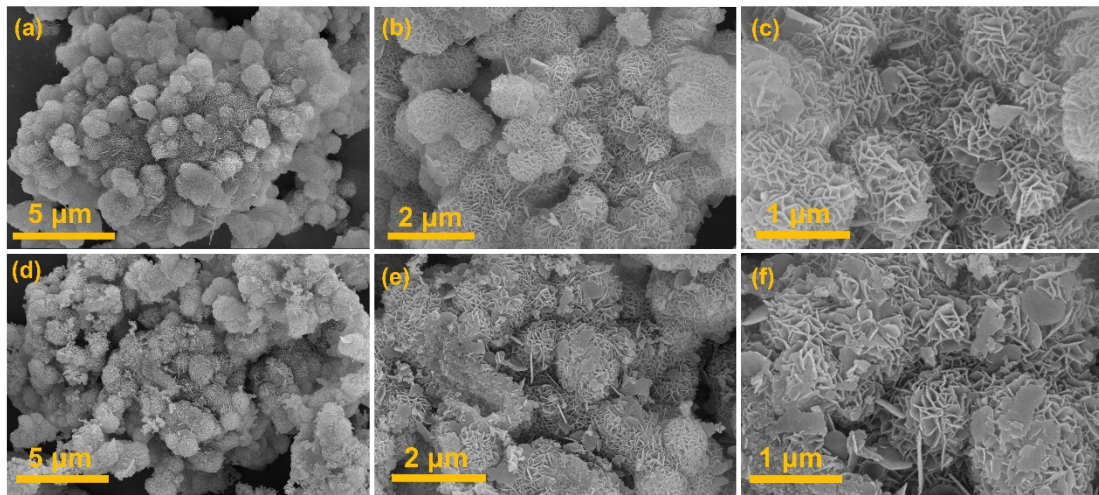

(h) NFM

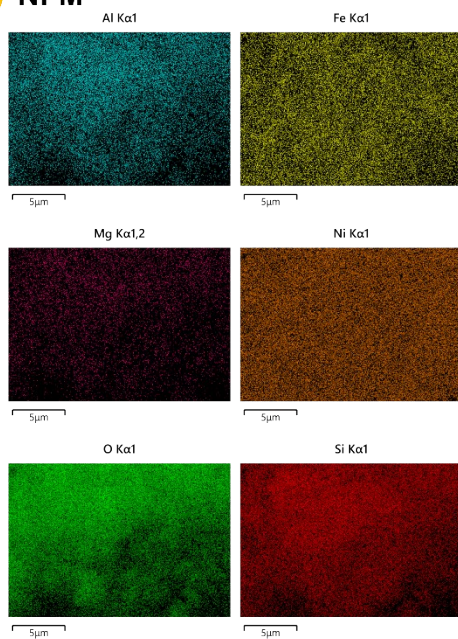

(i) MNFM

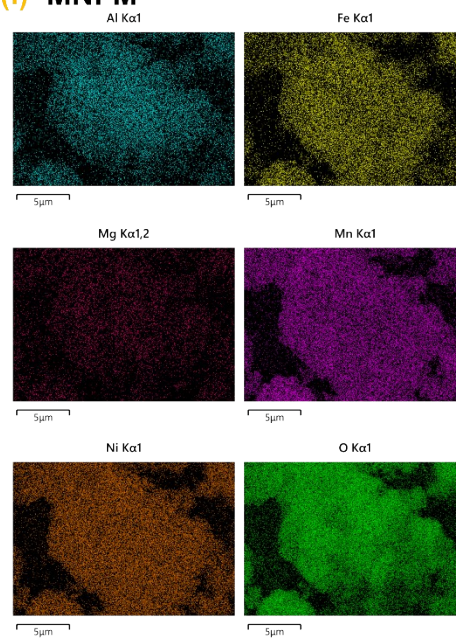

**Fig. S5.** SEM diagram after calcination at 250 °C, (a-c) NFM, (d-f) MNFM; (h) the EDS Mapping of NFM, (i) the EDS Mapping of MNFM.
